# Supplementary material
Source: PubMed Central journal article supplement (PMC3105649)
Supplement: 2010.031567_2.pdf [file 2010.031567_2.pdf]

**Manuscript no. HAEMATOL/2010/031567 entitled “Expression and effects of inhibition of IGF-IR tyrosine kinase in mantle cell lymphoma”**

**Authors: Deeksha Vishwamitra, Ping Shi, Desiree Wilson, Roxsan Manshoury, Francisco Vega, Ellen J. Schlette, and Hesham M. Amin**

**Information about the contributions of each person named as having participated in the study**

**1) Guarantor(s)**, i.e., person(s) who is (are) responsible for the integrity of the work as a whole:  
• Hesham M. Amin, Department of Hematopathology, the University of Texas M. D. Anderson Cancer Center, hamin@mdanderson.org

**The guarantors of this manuscript confirm that all persons designated as authors qualify for authorship, and that each author has participated sufficiently in the work to take public responsibility for appropriate portions of the content.**

**2) Authors who participated in the conception of the study:** Hesham M. Amin, Deeksha Vishwamitra, and Ping Shi

**3) Design & Methods.** The following authors were responsible for specific investigations (please detail):

• Hesham M. Amin, Deeksha Vishwamitra, and Ping Shi were responsible for all Design & Methods

**4) Results.** The following authors were responsible for specific portions of the results, including figures and tables (please indicate the person responsible for each figure and each table):

• Hesham M. Amin and Deeksha Vishwamitra were responsible for results shown in all the figures and Table 1

• Ping Shi participated in results shown in figures 1, 2, 3, and 5

• Desiree Wilson and Roxsan Manshoury participated in results shown in figures 1, 2, and 3

• Ellen J. Schlette and Francisco Vega participated in results shown in figure 1G (left panel) and Table 1

**5) Writing the manuscript.** The following authors were responsible for writing the manuscript:

• Deeksha Vishwamitra and Hesham M. Amin

**6) Contributors Listed in Acknowledgments:**

• Ms. Wei Qiao from the Department of Biostatistics at the University of Texas M. D. Anderson Cancer Center for excellent assistance with statistical analysis.

• Desiree Wilson is supported by Minority Access to Research Careers Fellowship (T34GM079088) from the National Institutes of Health.

• The work was supported by grant K08CA114395 from the National Institutes of Health, and by the Physician Scientist Program Award from The University of Texas M. D. Anderson Cancer Center to Hesham M. Amin.
